# Supplementary material for: Donor–acceptor type conjugated copolymers based on alternating BNBP and oligothiophene units: from electron acceptor to electron donor and from amorphous to semicrystalline
Source: Royal Society of Chemistry journal article supplement (doi:10.1039/d0ta07833f), 2020-01-01
Supplement: d0ta07833f1.pdf [file d0ta07833f1.pdf]

## Electronic Supplementary Information

# Donor-Acceptor type conjugated copolymers based on alternating BNPB and oligothiophene units: from electron acceptor to electron donor and from amorphous to semicrystalline

Junhui Miao,<sup>ab</sup> Hongxiang Li,<sup>ab</sup> Tao Wang,<sup>ac</sup> Yanchun Han,<sup>\*ab</sup> Jun Liu,<sup>\*ab</sup> and  
Lixiang Wang<sup>ab</sup>

<sup>a</sup>State Key Laboratory of Polymer Physics and Chemistry, Changchun Institute of Applied Chemistry, Chinese Academy of Sciences, Changchun, 130022, P. R. China

<sup>b</sup>School of Applied Chemistry and Engineering, University of Science and Technology of China, Hefei 230026, P. R. China

<sup>c</sup>University of Chinese Academy of Sciences, No. 19A Yuquan Road, Beijing 100049, P. R. China

### *Contents*

- 1. Estimating the persistence length ( $l_p$ ) for the polymers**

## 1. Estimating the persistence length ( $l_p$ ) for the polymers

### (1) Estimating the persistence length ( $l_p$ ) for P-1T

Firstly, the dihedral potential of P-1T was computed via density functional theory (DFT) calculation, the subsequent operation was done on a workstation using Mathematica.

```
PFTdihedral = {{0, 0.14230}, {10, 0.21529}, {20, 0.0}, {30, 0.68499}, {40, 2.73288}, {50, 5.99375}, {60, 9.71094}, {70, 13.19576}, {80, 15.86590}, {90, 17.14241}, {100, 16.40307}, {110, 13.94718}, {120, 10.53377}, {130, 6.99302}, {140, 4.08974}, {150, 2.25084}, {160, 1.59289}, {170, 1.34872}, {180, 1.28229}};
```

```
fitf[x_] = Fit[PFTdihedral, {1, Cos[Pi (x)/180], Cos[Pi (x)/180]^2, Cos[Pi (x)/180]^3, Cos[Pi (x)/180]^4, Cos[Pi (x)/180]^5, Cos[Pi (x)/180]^6, Cos[Pi (x)/180]^7, Cos[Pi (x)/180]^8, Cos[Pi (x)/180]^9, Cos[Pi (x)/180]^10, Cos[Pi (x)/180]^11, Cos[Pi (x)/180]^12, Cos[Pi (x)/180]^13, Cos[Pi (x)/180]^14}, (x)]
```

```
out = 17.144 - 1.8494 Cos[(Pi x)/180] - 35.0774 Cos[(Pi x)/180]^2 + 10.6905 Cos[(Pi x)/180]^3 + 58.091 Cos[(Pi x)/180]^4 - 47.3438 Cos[(Pi x)/180]^5 - 223.878 Cos[(Pi x)/180]^6 + 120.768 Cos[(Pi x)/180]^7 + 592.221 Cos[(Pi x)/180]^8 - 180.757 Cos[(Pi x)/180]^9 - 862.41 Cos[(Pi x)/180]^10 + 140.591 Cos[(Pi x)/180]^11 + 651.263 Cos[(Pi x)/180]^12 - 42.6464 Cos[(Pi x)/180]^13 - 196.632 Cos[(Pi x)/180]^14
```

```
Show[ListPlot[{PFTdihedral}, PlotMarkers → Automatic, PlotStyle → {Blue}, PlotRange → All, Frame → True, FrameTicks → {Automatic, Automatic, Automatic, Automatic}, FrameLabel → {"Dihedral Angle [Deg.]", "Dihedral Potential (kJ/mol)"}, LabelStyle → Directive[FontFamily → "Helvetica", 16], PlotLegends → (Style[#, FontFamily → "Helvetica", FontSize → 16] & /@ {"Dihedral BNP-FT"}), Plot[{fitf[x]}, {x, 0, 180}, PlotStyle → {{Blue, Thickness[0.004], Dashed}, {Purple, Thickness[0.004], Dashed}}, PlotRange → All, Frame → True, Axes → False, FrameLabel → {"Dihedral Angle [deg.]", "Dihedral Potential (kJ/mol)"}, FrameTicks → {True, True, True, True}, LabelStyle → Directive[FontFamily → "Helvetica", 16]]]
```

out =

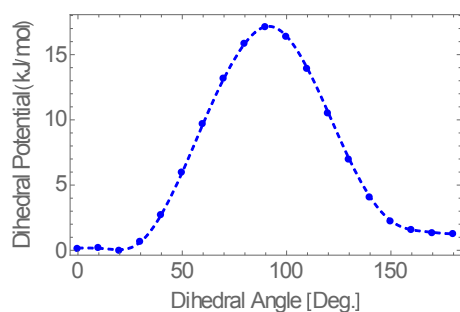

According to the dihedral potential, we compute the dihedral distribution of P-1T  $p(\Phi)$  using Boltzmann Factors.

$$kTval = 2.43652$$

$$normVal = 2 NIntegrate[Exp[-fitf[x]/kTval], \{x, 0, 180\}];$$

*Clear[prob]*

$$prob[x_] := Exp[-fitf[x]/kTval]/normVal /; 0 \leq x \leq 180;$$

$$prob[x_] := prob[360 - x] /; 180 < x \leq 360;$$

*Plot[prob[x], \{x, 0, 360\}, PlotStyle  $\rightarrow$  \{Thickness[0.004], Red\}, PlotRange  $\rightarrow$  All, Frame  $\rightarrow$  True, FrameTicks  $\rightarrow$  \{Automatic, Automatic, Automatic, Automatic\}, FrameLabel  $\rightarrow$  \{None, "Probability"\}, LabelStyle  $\rightarrow$  Directive[FontFamily  $\rightarrow$  "Helvetica", 16]]*

out=

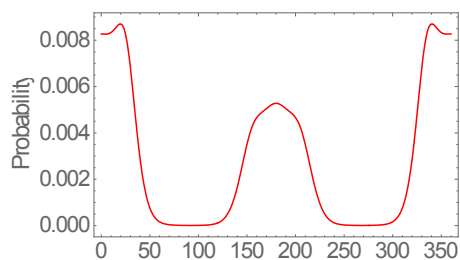

Here we compute the table of cumulative probability for P-1T  $p^c(\Phi)$ .

$$pIntTable = Quiet[Table[\{NIntegrate[prob[xp], \{xp, 0, x\}], x\}, \{x, 0, 360\}];$$

*ListLinePlot[pIntTable, PlotStyle  $\rightarrow$  \{PointSize[.004], Red\}, Frame  $\rightarrow$  True, Axes  $\rightarrow$  False, FrameLabel  $\rightarrow$  \{"Cumulative Probability", "Dihedral Angle [deg]"\}, FrameTicks  $\rightarrow$  \{Automatic, Automatic, Automatic, Automatic\}, LabelStyle  $\rightarrow$  Directive[FontFamily  $\rightarrow$  "Helvetica", 16]]*

out =

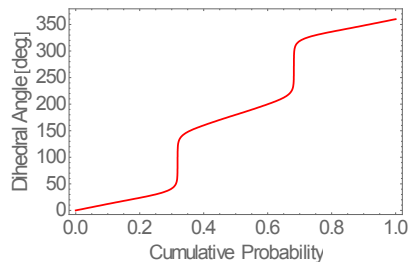

Then, we interpolate the table of cumulative probability to construct a function for later calculations.

$th[prob\_] = Interpolation[pIntTable][prob];$

We construct the P-1T chain:

Length of C-C (across the BNPB unit) is 7.03942 Å;

Length of C-C bond (between the BNPB unit and fluoro-thiophene) is 1.45982 Å;

Length of C-S-C (across fluoro-thiophenering) is 2.55872 Å;

Length of C-C bond (between fluoro-thiophene and the BNPB unit) is 1.45965 Å;

Deflection angles (the angle corresponding to the deflection of P-1T backbone bond from Z-axis) are listed below from angle 1 to angle 4.

$lbb = 7.03942;$

$lcc1 = 1.45982;$

$lcsc1 = 2.55872;$

$lcc2 = 1.45965;$

$l = \{lbb, lcc1, lcsc1, lcc2\};$

$Angle1 = 2.87882/180 Pi;$

$Angle2 = -15.10907/180 Pi;$

$Angle3 = -14.94322/180 Pi;$

$Angle4 = 2.94505/180 Pi;$

$Angle = \{Angle1, Angle2, Angle3, Angle4\};$

$v[i\_] := If[i > 1, RotationMatrix[Angle[[Mod[i - 1, 4, 1]]]].v[i - 1]*(l[[Mod[i, 4, 1]])]/(l[[Mod[i - 1, 4, 1]]]), l[[1]] \{1, 0\}$

Now we can construct an initial conformation for P-1T.

$chain[n\_] := Append[\#, 0] \& /@ Prepend[Accumulate[Table[v[k], \{k, 1, n\}], \{0, 0\}]; drawChain[pts\_] := Graphics3D[\{PointSize[.03], Point /@ pts, Thick,$

```
Table[{Hue[(1/4) Mod[i, 4]], Line[{pts[[i]], pts[[i + 1]]}], {i, 1, Length[pts] - 1}}];
```

A drawing of P-1T dimer is obtained.

```
drawChain[chain[8]]
```

out =

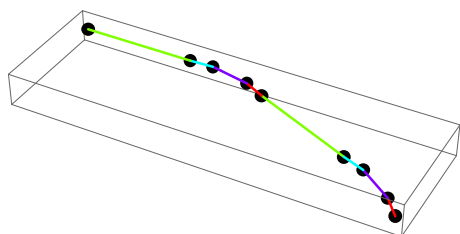

We rotate a backbone dihedral angle by certain degree. Only the tangent vectors with even index (corresponding to the inter-moiety bond) will be rotated.

```
dihedralRotate[pts_, nb_?EvenQ, theta_] := Module[{}, vec = pts[[nb + 1]] - pts[[nb]]; origin = pts[[nb]]; rot = RotationMatrix[theta, vec]; Join[Take[pts, nb], origin + (rot.(# - origin)) & /@ Drop[pts, nb]]]
```

The function below computing the tangent correlation between the 1<sup>st</sup> inter-moiety vector in the monomer and the 1<sup>st</sup> inter-moiety vector in the 1<sup>st</sup> monomer.

```
cosVals[pts_] := Table[(pts[[k]] - pts[[k - 1]]) . (pts[[3]] - pts[[2]]) / (Norm[pts[[k]] - pts[[k - 1]]] Norm[pts[[3]] - pts[[2]]]), {k, 3, Length[pts], 4}]
```

```
randomRotate[pts_] := Module[{}, newpts = pts; Do[If[(k - 4 Floor[k/4]) == 2, newpts = dihedralRotate[newpts, k, th[RandomReal[]] Degree], If[(k - 4 Floor[k/4]) == 0, newpts = dihedralRotate[newpts, k, th[RandomReal[]] Degree]], {k, 2, Length[pts], 2}]; newpts]
```

We rotate a P-1T 20mer over 10,000 times to compute tangent-tangent correlation function.

```
Clear[ch]
ch = chain[40];
cosList2 = ParallelTable[cosVals[randomRotate[ch]], {10000}]; corr2 = Plus @@ cosList2/10000; ListPlot[Table[{i - 1, Log[corr2[[i]]}], {i, 1, 10}],
PlotStyle -> {Blue, PointSize[0.02]}, Frame -> True, FrameLabel -> {"Repeat Units", "<V0.Vn>"}, FrameTicks -> {Automatic, Automatic, Automatic, Automatic},
```

*LabelStyle* → *Directive*[*FontFamily* → "Helvetica", 16]]

out =

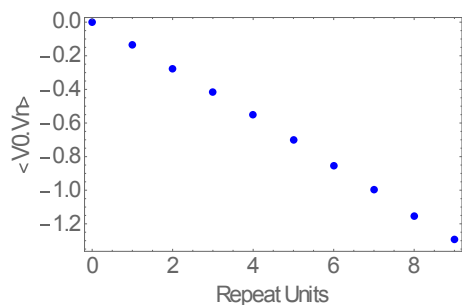

$$\logFitP-IT[x_] = Fit[Log[corr2[[1 ;; 10]]], \{1, x\}, x]$$

out =

$$0.156401 - 0.144447 x$$

The number of repeat units ( $N_p$ ) of P-1T is compute as the following:  $-1/\logFitP-IT'[x]$

out =

$$6.92294$$

## (2) Estimating the persistence length ( $l_p$ ) for P-2T

Type A dihedral is the dihedral angle between fluoro-thiophene and fluoro-thiophene. Type B dihedral is the dihedral angle between fluoro-thiophene and the BNPB unit.

$$dihedralA = \{\{180, 0.0\}, \{170, 0.80839\}, \{160, 3.06212\}, \{150, 5.96645\}, \{140, 9.14304\}, \{130, 12.41336\}, \{120, 15.63354\}, \{110, 18.38454\}, \{100, 20.43925\}, \{90, 21.47396\}, \{80, 21.15969\}, \{70, 19.32473\}, \{60, 16.66142\}, \{50, 13.85083\}, \{40, 12.48294\}, \{30, 12.23667\}, \{20, 13.49454\}, \{10, 15.80315\}, \{0, 17.65229\}\};$$

$$dihedralB = \{\{180, 0.78240\}, \{170, 0.44030\}, \{160, 0.0\}, \{150, 0.18851\}, \{140, 1.53802\}, \{130, 4.14068\}, \{120, 7.74575\}, \{110, 11.51203\}, \{100, 14.43789\}, \{90, 15.78477\}, \{80, 15.01366\}, \{70, 12.19098\}, \{60, 8.54784\}, \{50, 5.26518\}, \{40, 2.95185\}, \{30, 1.66562\}, \{20, 1.43904\}, \{10, 2.04973\}, \{0, 2.64834\}\};$$

The dihedral potentials were fitted by the following equations.

$$fitfA[x_] = Fit[dihedralA, \{1, Cos[\Pi (x)/180], Cos[\Pi (x)/180]^2, Cos[\Pi (x)/180]^3, Cos[\Pi (x)/180]^4, Cos[\Pi (x)/180]^5, Cos[\Pi (x)/180]^6, Cos[\Pi$$

$(x)/180]^7, \text{Cos}[\text{Pi}(x)/180]^8, \text{Cos}[\text{Pi}(x)/180]^9, \text{Cos}[\text{Pi}(x)/180]^10, \text{Cos}[\text{Pi}(x)/180]^11, \text{Cos}[\text{Pi}(x)/180]^12, \text{Cos}[\text{Pi}(x)/180]^13, \text{Cos}[\text{Pi}(x)/180]^14, (x)]$

out =

$21.4813 + 2.43265 \text{Cos}[(\text{Pi} x)/180] - 23.0884 \text{Cos}[(\text{Pi} x)/180]^2 - 14.2836 \text{Cos}[(\text{Pi} x)/180]^3 + 5.14481 \text{Cos}[(\text{Pi} x)/180]^4 + 65.1001 \text{Cos}[(\text{Pi} x)/180]^5 + 22.4405 \text{Cos}[(\text{Pi} x)/180]^6 - 202.357 \text{Cos}[(\text{Pi} x)/180]^7 - 130.314 \text{Cos}[(\text{Pi} x)/180]^8 + 405.221 \text{Cos}[(\text{Pi} x)/180]^9 + 345.295 \text{Cos}[(\text{Pi} x)/180]^10 - 396.137 \text{Cos}[(\text{Pi} x)/180]^11 - 384.079 \text{Cos}[(\text{Pi} x)/180]^12 + 148.822 \text{Cos}[(\text{Pi} x)/180]^13 + 151.912 \text{Cos}[(\text{Pi} x)/180]^14$

$\text{fitfB}[x_] = \text{Fit}[\text{dihedralB}, \{1, \text{Cos}[\text{Pi}(x)/180], \text{Cos}[\text{Pi}(x)/180]^2, \text{Cos}[\text{Pi}(x)/180]^3, \text{Cos}[\text{Pi}(x)/180]^4, \text{Cos}[\text{Pi}(x)/180]^5, \text{Cos}[\text{Pi}(x)/180]^6, \text{Cos}[\text{Pi}(x)/180]^7, \text{Cos}[\text{Pi}(x)/180]^8, \text{Cos}[\text{Pi}(x)/180]^9, \text{Cos}[\text{Pi}(x)/180]^10, \text{Cos}[\text{Pi}(x)/180]^11, \text{Cos}[\text{Pi}(x)/180]^12, \text{Cos}[\text{Pi}(x)/180]^13, \text{Cos}[\text{Pi}(x)/180]^14, (x)]$

out =

$15.7833 + 2.10384 \text{Cos}[(\text{Pi} x)/180] - 35.2977 \text{Cos}[(\text{Pi} x)/180]^2 - 17.132 \text{Cos}[(\text{Pi} x)/180]^3 + 5.3483 \text{Cos}[(\text{Pi} x)/180]^4 + 87.4049 \text{Cos}[(\text{Pi} x)/180]^5 + 109.303 \text{Cos}[(\text{Pi} x)/180]^6 - 224.811 \text{Cos}[(\text{Pi} x)/180]^7 - 317.55 \text{Cos}[(\text{Pi} x)/180]^8 + 319.316 \text{Cos}[(\text{Pi} x)/180]^9 + 476.497 \text{Cos}[(\text{Pi} x)/180]^10 - 239.633 \text{Cos}[(\text{Pi} x)/180]^11 - 368.608 \text{Cos}[(\text{Pi} x)/180]^12 + 73.68 \text{Cos}[(\text{Pi} x)/180]^13 + 116.23 \text{Cos}[(\text{Pi} x)/180]^14$

$\text{Show}[\text{ListPlot}[\{\text{dihedralA}, \text{dihedralB}\}, \text{PlotMarkers} \rightarrow \text{Automatic}, \text{PlotStyle} \rightarrow \{\{\text{Blue}\}, \{\text{Purple}\}\}, \text{PlotRange} \rightarrow \text{All}, \text{Frame} \rightarrow \text{True}, \text{FrameTicks} \rightarrow \{\text{Automatic}, \text{Automatic}, \text{Automatic}, \text{Automatic}\}, \text{FrameLabel} \rightarrow \{\text{"Dihedral Angle [Deg.]", "Dihedral Potential (kJ/mol)}\}, \text{LabelStyle} \rightarrow \text{Directive}[\text{FontFamily} \rightarrow \text{"Helvetica"}, 16], \text{PlotLegends} \rightarrow (\text{Style}[\#, \text{FontFamily} \rightarrow \text{"Helvetica"}, \text{FontSize} \rightarrow 16] \& /@ \{\text{"Dihedral T-T"}, \text{"Dihedral BNBP-T"}\}), \text{Plot}[\{\text{fitfA}[x], \text{fitfB}[x]\}, \{x, 0, 180\}, \text{PlotStyle} \rightarrow \{\{\text{Blue}, \text{Thickness}[0.004], \text{Dashed}\}, \{\text{Purple}, \text{Thickness}[0.004], \text{Dashed}\}\}, \text{PlotRange} \rightarrow \text{All}, \text{Frame} \rightarrow \text{True}, \text{Axes} \rightarrow \text{False}, \text{FrameLabel} \rightarrow \{\text{"Dihedral Angle [deg.]", "Dihedral Potential (kJ/mol)}\}, \text{FrameTicks} \rightarrow \{\text{True}, \text{True}, \text{True}, \text{True}\}, \text{LabelStyle} \rightarrow \text{Directive}[\text{FontFamily} \rightarrow \text{"Helvetica"}, 16]]]$

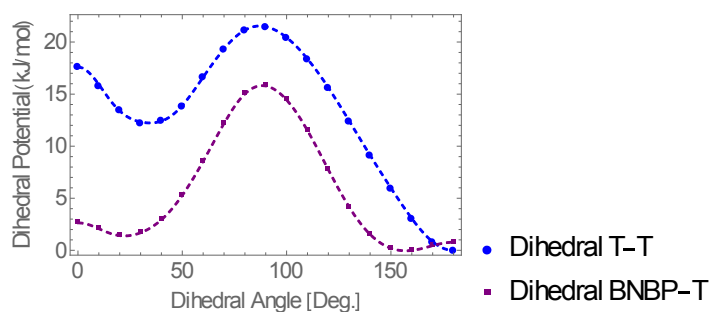

$$kTval = 2.43652$$

$$normValA = 2 NIntegrate[Exp[-fitfA[x]/kTval], \{x, 0, 180\}];$$

$$normValB = 2 NIntegrate[Exp[-fitfB[x]/kTval], \{x, 0, 180\}];$$

$probA[x_] := Exp[-fitfA[x]/kTval]/normValA$  ;  $0 \leq 180$ ;  $probA[x_] := probA[360 - x]$  ;  $180 < x \leq 360$ ;  $probB[x_] := Exp[-fitfB[x]/kTval]/normValB$  ;  $0 \leq x \leq 180$ ;  $probB[x_] := probB[360 - x]$  ;  $180 < x \leq 360$ ;

$Plot[\{probA[x], probB[x]\}, \{x, 0, 360\}, PlotStyle \rightarrow Automatic, PlotRange \rightarrow Automatic, Frame \rightarrow True, FrameTicks \rightarrow \{Automatic, Automatic, Automatic, Automatic\}, FrameLabel \rightarrow \{"Dihedral Angle [deg.]", "Probability"\}, LabelStyle \rightarrow Directive[FontFamily \rightarrow "Helvetica", 16], PlotLegends \rightarrow (Style[\#, FontFamily \rightarrow "Helvetica", FontSize \rightarrow 16] \& /@ \{"Dihedral T-T", "Dihedral BNPB-T"\})]$

out =

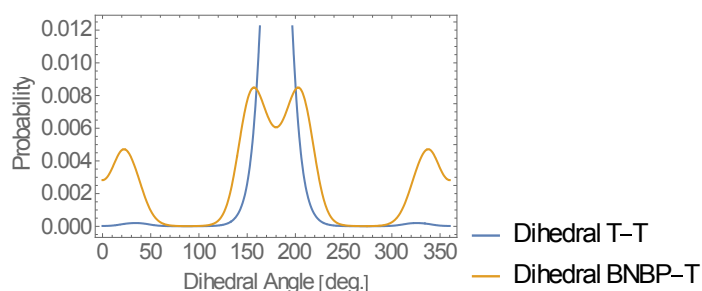

Here we compute the cumulative probability for both A and B types of dihedral angles.

$$pIntTableA = Quiet[Table[\{NIntegrate[probA[xp], \{xp, 0, x\}], x\}, \{x, 0, 360\}]];$$

$$pIntTableB = Quiet[Table[\{NIntegrate[probB[xp], \{xp, 0, x\}], x\}, \{x, 0, 360\}]];$$

$ListLinePlot[\{pIntTableA, pIntTableB\}, PlotStyle \rightarrow Automatic, Frame \rightarrow True, Axes \rightarrow False, FrameLabel \rightarrow \{"Cumulative Probability", "Dihedral Angle [deg.]\"}, FrameTicks \rightarrow \{Automatic, Automatic, Automatic, Automatic\}, LabelStyle \rightarrow Directive[FontFamily \rightarrow "Helvetica", 16], PlotLegends \rightarrow (Style[\#, FontFamily \rightarrow$



"Helvetica", FontSize → 16] & /@ {"Dihedral T-T", "Dihedral BNPB-T"}]

out =

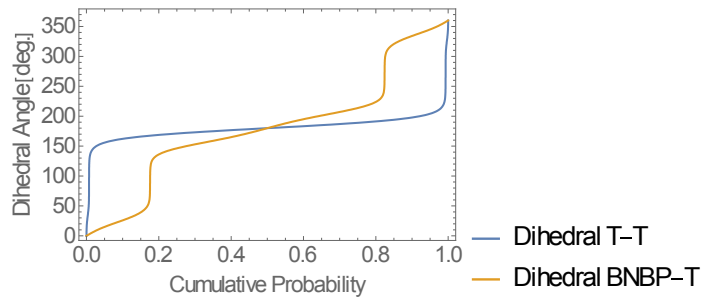

$thA[prob\_] = Interpolation[pIntTableA][prob];$

$thB[prob\_] = Interpolation[pIntTableB][prob];$

We construct the P-2T chain:

Length of C-C (across the 1<sup>st</sup> fluoro-thiophene) is 2.52980 Å;

Length of C-C bond (between the 1<sup>st</sup> fluoro-thiophene and the 2<sup>nd</sup> fluoro-thiophene) is 1.43818 Å;

Length of C-C (across the 2<sup>nd</sup> fluoro-thiophene) is 2.53079 Å;

Length of C-C bond (between the 2<sup>nd</sup> fluoro-thiophene and the BNPB unit) is 1.46141 Å;

Length of C-C (across the BNPB unit) is 7.03842 Å;

Length of C-C bond (between the BNPB unit and the 3<sup>rd</sup> fluoro-thiophene) is 1.46057 Å;

Deflection angles (the angle corresponding to the deflection of P-2T backbone bond from Z-axis) are listed below from angle 1 to angle 6.

$lbb = 2.52980;$

$lcc1 = 1.43818;$

$lcsc1 = 2.53079;$

$lcc2 = 1.46141;$

$lcsc2 = 7.03842;$

$lcc3 = 1.46057;$

$l = \{lbb, lcc1, lcsc1, lcc2, lcsc2, lcc3\};$

$Angle1 = -13.00995/180 Pi;$

*Angle2 = 13.01544/180 Pi;*

*Angle3 = 14.93897/180 Pi;*

*Angle4 = -2.42596/180 Pi;*

*Angle5 = 2.74260/180 Pi;*

*Angle6 = -15.00185/180 Pi;*

*Angle = {Angle1, Angle2, Angle3, Angle4, Angle5, Angle6};*

*v[i\_] := If[i > 1, RotationMatrix[Angle[[Mod[i - 1, 6, 1]]]].v[i - 1]\*(l[[Mod[i, 6, 1]]])/(l[[Mod[i - 1, 6, 1]]]), l[[1]] {1, 0}]*

Now we can construct an initial conformation for P-2T.

*chain[n\_] := Append[#, 0] & /@ Prepend[Accumulate[Table[v[k], {k, 1, n}]], {0, 0}]; drawChain[pts\_] := Graphics3D[{PointSize[.03], Point /@ pts, Thick, Table[{Hue[(1/6) Mod[i, 6]], Line[{pts[[i]], pts[[i + 1]]}], {i, 1, Length[pts] - 1}]}];*

A drawing of P-2T dimer is obtained.

*drawChain[chain[12]]*

*out =*

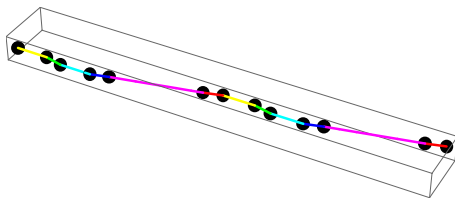

Then, we rotate a backbone dihedral angle by certain degree. Only the tangent vectors with even index (corresponding to the inter-moiety bond) will be rotated.

*dihedralRotate[pts\_, nb\_?EvenQ, theta\_] := Module[{}, vec = pts[[nb + 1]] - pts[[nb]]; origin = pts[[nb]]; rot = RotationMatrix[theta, vec]; Join[Take[pts, nb], origin + (rot.(# - origin)) & /@ Drop[pts, nb]]*

The function below computing the tangent correlation between the 1<sup>st</sup> inter-moiety vector in the monomer and the 1<sup>st</sup> inter-moiety vector in the 1<sup>st</sup> monomer.

*cosVals[pts\_] := Table[(pts[[k]] - pts[[k - 1]]) . (pts[[3]] - pts[[2]]) / (Norm[pts[[k]] - pts[[k - 1]]] Norm[pts[[3]] - pts[[2]]]), {k, 3, Length[pts], 6}]*  
*randomRotate[pts\_] := Module[{}, newpts = pts;*

*Do[If[(k - 6 Floor[k/6]) == 2, newpts = dihedralRotate[newpts, k,*

```

thA[RandomReal[] Degree], If[(k - 6 Floor[k/6]) == 4, newpts =
dihedralRotate[newpts, k, thB[RandomReal[] Degree], If[(k - 6 Floor[k/6]) == 0,
newpts = dihedralRotate[newpts, k, thB[RandomReal[] Degree]]]], {k, 2,
Length[pts], 2}]; newpts]

```

We rotate a P-2T 10mer over 10,000 times to compute tangent-tangent correlation function.

```

Clear[ch]
ch = chain[60];
cosList2 = ParallelTable[cosVals[randomRotate[ch]], {10000}];
corr2 = Plus @@ cosList2/10000;
ListPlot[Table[{i - 1, Log[corr2[[i]]]}, {i, 1, 10}], PlotStyle -> {Blue,
PointSize[0.02]}, Frame -> True, FrameLabel -> {"Repeat Units", "<V0.Vn>"},
FrameTicks -> {Automatic, Automatic, Automatic, Automatic}, LabelStyle ->
Directive[FontFamily -> "Helvetica", 16]]

```

out =

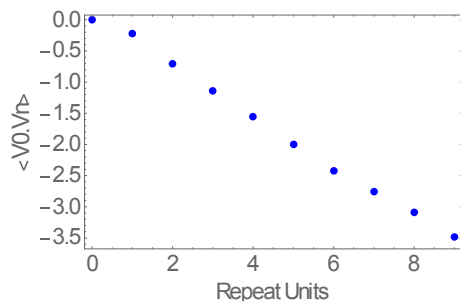

```

logFitP-2T[x_] = Fit[Log[corr2[[1 ;; 10]]], {1, x}, x]

```

out =

0.463386 - 0.400209 x

The number of repeat units ( $N_p$ ) of P-2T is compute as the following:  $-1/\logFitP-2T'[x]$

out =

2.4987

### (3) Estimating the persistence length ( $l_p$ ) for P-3T

Type A dihedral is the dihedral angle between fluoro-thiophene and thiophene.

Type B dihedral is the dihedral angle between fluoro-thiophene and the BNPB unit.

$dihedralA = \{\{180, 0.0\}, \{170, 0.53560\}, \{160, 1.68583\}, \{150, 3.41840\}, \{140, 5.88716\}, \{130, 8.93825\}, \{120, 11.95784\}, \{110, 14.99581\}, \{100, 17.48215\}, \{90, 18.27427\}, \{80, 17.59164\}, \{70, 15.52668\}, \{60, 12.60109\}, \{50, 9.41846\}, \{40, 6.60917\}, \{30, 4.49276\}, \{20, 3.11069\}, \{10, 2.60528\}, \{0, 2.73026\}\};$

$dihedralB = \{\{180, 0.86248\}, \{170, 0.54505\}, \{160, 0.0\}, \{150, 0.27358\}, \{140, 1.80398\}, \{130, 4.57467\}, \{120, 8.15612\}, \{110, 11.79768\}, \{100, 15.09059\}, \{90, 16.55693\}, \{80, 15.57027\}, \{70, 12.94739\}, \{60, 9.61616\}, \{50, 6.27127\}, \{40, 3.74370\}, \{30, 2.36295\}, \{20, 2.29968\}, \{10, 3.13774\}, \{0, 3.80409\}\};$

The dihedral potentials were fitted by the following equations.

$fitfA[x_] = Fit[dihedralA, \{1, Cos[Pi (x)/180], Cos[Pi (x)/180]^2, Cos[Pi (x)/180]^3, Cos[Pi (x)/180]^4, Cos[Pi (x)/180]^5, Cos[Pi (x)/180]^6, Cos[Pi (x)/180]^7, Cos[Pi (x)/180]^8, Cos[Pi (x)/180]^9, Cos[Pi (x)/180]^10, Cos[Pi (x)/180]^11, Cos[Pi (x)/180]^12, Cos[Pi (x)/180]^13, Cos[Pi (x)/180]^14\}, (x)]$

*out =*

$18.2894 + 0.0185695 Cos[(Pi x)/180] - 24.644 Cos[(Pi x)/180]^2 + 12.3216 Cos[(Pi x)/180]^3 - 34.4943 Cos[(Pi x)/180]^4 - 63.2679 Cos[(Pi x)/180]^5 + 296.315 Cos[(Pi x)/180]^6 + 108.741 Cos[(Pi x)/180]^7 - 852.548 Cos[(Pi x)/180]^8 - 35.094 Cos[(Pi x)/180]^9 + 1222.8 Cos[(Pi x)/180]^10 - 67.4607 Cos[(Pi x)/180]^11 - 866.185 Cos[(Pi x)/180]^12 + 46.0912 Cos[(Pi x)/180]^13 + 241.833 Cos[(Pi x)/180]^14$

$fitfB[x_] = Fit[dihedralB, \{1, Cos[Pi (x)/180], Cos[Pi (x)/180]^2, Cos[Pi (x)/180]^3, Cos[Pi (x)/180]^4, Cos[Pi (x)/180]^5, Cos[Pi (x)/180]^6, Cos[Pi (x)/180]^7, Cos[Pi (x)/180]^8, Cos[Pi (x)/180]^9, Cos[Pi (x)/180]^10, Cos[Pi (x)/180]^11, Cos[Pi (x)/180]^12, Cos[Pi (x)/180]^13, Cos[Pi (x)/180]^14\}, (x)]$

*out =*

$16.5674 + 1.22343 Cos[(Pi x)/180] - 44.0116 Cos[(Pi x)/180]^2 + 8.41646 Cos[(Pi x)/180]^3 + 95.2529 Cos[(Pi x)/180]^4 - 56.6009 Cos[(Pi x)/180]^5 - 261.765 Cos[(Pi x)/180]^6 + 149.081 Cos[(Pi x)/180]^7 + 473.503 Cos[(Pi x)/180]^8 - 186.502 Cos[(Pi x)/180]^9 - 463.847 Cos[(Pi x)/180]^10 + 107.194$

$\text{Cos}[(\text{Pi} x)/180]^{11} + 223.863 \text{Cos}[(\text{Pi} x)/180]^{12} - 21.3573 \text{Cos}[(\text{Pi} x)/180]^{13} - 37.2334 \text{Cos}[(\text{Pi} x)/180]^{14}$

```
Show[ListPlot[{dihedralA, dihedralB}, PlotMarkers -> Automatic, PlotStyle ->
{{Blue}, {Purple}}, PlotRange -> All, Frame -> True, FrameTicks -> {Automatic,
Automatic, Automatic, Automatic}, FrameLabel -> {"Dihedral Angle [Deg.]",
"Dihedral Potential (kJ/mol)"}, LabelStyle -> Directive[FontFamily -> "Helvetica",
16], PlotLegends -> (Style[#, FontFamily -> "Helvetica", FontSize -> 16] & /@
{"Dihedral T-T", "Dihedral BNPB-T"}), Plot[{fitfA[x], fitfB[x]}, {x, 0, 180},
PlotStyle -> {{Blue, Thickness[0.004], Dashed}, {Purple, Thickness[0.004],
Dashed}}, PlotRange -> All, Frame -> True, Axes -> False, FrameLabel ->
{"Dihedral Angle [deg.]", "Dihedral Potential (kJ/mol)"}, FrameTicks -> {True, True,
True, True}, LabelStyle -> Directive[FontFamily -> "Helvetica", 16]]]
```

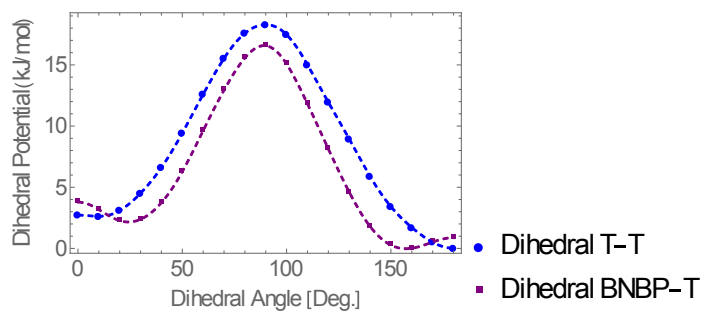

$kTval = 2.43652$

$normValA = 2 NIntegrate[Exp[-fitfA[x]/kTval], \{x, 0, 180\}];$

$normValB = 2 NIntegrate[Exp[-fitfB[x]/kTval], \{x, 0, 180\}];$

$probA[x_] := Exp[-fitfA[x]/kTval]/normValA /; 0 \leq x \leq 180; probA[x_] :=$   
 $probA[360 - x] /; 180 < x \leq 360; probB[x_] := Exp[-fitfB[x]/kTval]/normValB /; 0 \leq$   
 $x \leq 180; probB[x_] := probB[360 - x] /; 180 < x \leq 360;$

```
Plot[{probA[x], probB[x]}, {x, 0, 360}, PlotStyle -> Automatic, PlotRange ->
Automatic, Frame -> True, FrameTicks -> {Automatic, Automatic, Automatic,
Automatic}, FrameLabel -> {"Dihedral Angle [deg.]", "Probability"}, LabelStyle ->
Directive[FontFamily -> "Helvetica", 16], PlotLegends -> (Style[#, FontFamily ->
"Helvetica", FontSize -> 16] & /@ {"Dihedral T-T", "Dihedral BNPB-T"})]
```

out =

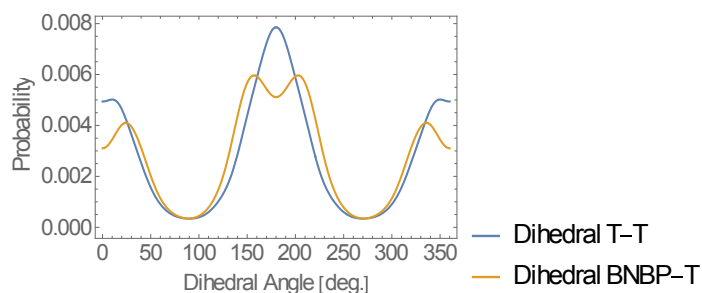

Here we compute the cumulative probability for both A and B types of dihedral angles.

```

pIntTableA = Quiet[Table[{NIntegrate[probA[xp], {xp, 0, x}], x}, {x, 0, 360}]];
pIntTableB = Quiet[Table[{NIntegrate[probB[xp], {xp, 0, x}], x}, {x, 0, 360}]];
ListLinePlot[{pIntTableA, pIntTableB}, PlotStyle -> Automatic, Frame -> True,
Axes -> False, FrameLabel -> {"Cumulative Probability", "Dihedral Angle [deg.]"},
FrameTicks -> {Automatic, Automatic, Automatic, Automatic}, LabelStyle ->
Directive[FontFamily -> "Helvetica", 16], PlotLegends -> (Style[#, FontFamily ->
"Helvetica", FontSize -> 16] & /@ {"Dihedral T-T", "Dihedral BNPB-T"})]

```

out =

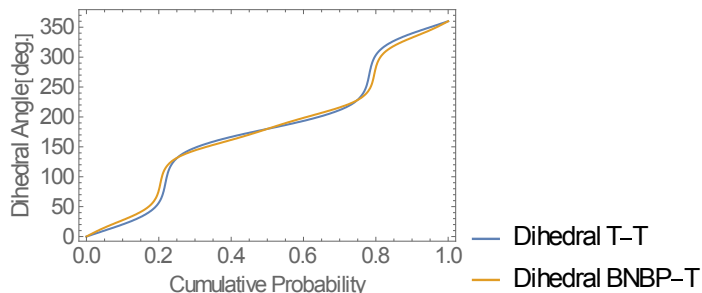

```
thA[prob_] = Interpolation[pIntTableA][prob];
```

```
thB[prob_] = Interpolation[pIntTableB][prob];
```

We construct the P-3T chain:

Length of C-C (across the BNPB unit) is 7.04271 Å;

Length of C-C bond (between the BNPB unit and the) is 1.46076 Å;

Length of C-C (across the 1<sup>st</sup> fluoro-thiophene) is 2.52059 Å;

Length of C-C bond (between the 1<sup>st</sup> fluoro-thiophene and the thiophene) is 1.43939 Å;

Length of C-C (across the thiophene) is 2.55595 Å;

Length of C-C bond (between the thiophene and the 2<sup>nd</sup> fluoro-thiophene) is

1.43982 Å;

Length of C-C (across the 2<sup>nd</sup> fluoro-thiophene) is 2.51898 Å;

Length of C-C bond (between the 2<sup>nd</sup> fluoro-thiophene and the 2<sup>nd</sup> BNBP unit) is 1.46163 Å;

Deflection angles (the angle corresponding to the deflection of P-3T backbone bond from Z-axis) are listed below from angle 1 to angle 8.

$l_{bb} = 7.04271$ ;

$l_{cc1} = 1.46076$ ;

$l_{csc1} = 2.52059$ ;

$l_{cc2} = 1.43939$ ;

$l_{csc2} = 2.55595$ ;

$l_{cc3} = 1.43982$ ;

$l_{csc3} = 2.51898$

$l_{cc4} = 1.46163$

$l = \{l_{bb}, l_{cc1}, l_{csc1}, l_{cc2}, l_{csc2}, l_{cc3}, l_{csc3}, l_{cc4}\}$ ;

$Angle1 = 3.57929/180 \text{ Pi}$ ;

$Angle2 = -14.72266/180 \text{ Pi}$ ;

$Angle3 = -14.45890/180 \text{ Pi}$ ;

$Angle4 = 14.65067/180 \text{ Pi}$ ;

$Angle5 = 14.63730/180 \text{ Pi}$ ;

$Angle6 = -14.40836/180 \text{ Pi}$ ;

$Angle7 = -14.38586/180 \text{ Pi}$ ;

$Angle8 = -2.90725/180 \text{ Pi}$ ;

$Angle = \{Angle1, Angle2, Angle3, Angle4, Angle5, Angle6, Angle7, Angle8\}$ ;

$v[i_] := \text{If}[i > 1, \text{RotationMatrix}[Angle[[\text{Mod}[i - 1, 8, 1]]]].v[i - 1]*(l[[\text{Mod}[i, 8, 1]]])]/(l[[\text{Mod}[i - 1, 8, 1]]]), l[[1]] \{1, 0\}}$

We can construct an initial conformation for P-3T.

$chain[n_] := \text{Append}[\#, 0] \& /@ \text{Prepend}[\text{Accumulate}[\text{Table}[v[k], \{k, 1, n\}], \{0, 0\}]; \text{drawChain}[pts_] := \text{Graphics3D}[\{\text{PointSize}[\.03], \text{Point} /@ pts, \text{Thick}, \text{Table}[\{\text{Hue}[(1/8) \text{Mod}[i, 8]], \text{Line}[\{pts[[i]], pts[[i + 1]]\}], \{i, 1, \text{Length}[pts] - 1\}\}];$

A drawing of P-3T dimer is obtained.

```
drawChain[chain[16]]
```

out =

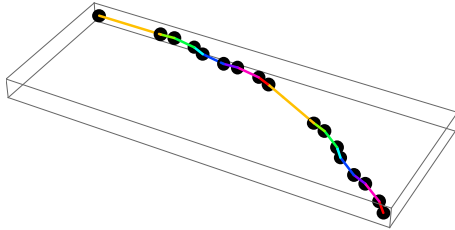

Then, we rotate a backbone dihedral angle by certain degree. Only the tangent vectors with even index (corresponding to the inter-moiety bond) will be rotated.

```
dihedralRotate[pts_, nb_?EvenQ, theta_] := Module[{}, vec = pts[[nb + 1]] -
pts[[nb]]; origin = pts[[nb]]; rot = RotationMatrix[theta, vec]; Join[Take[pts, nb],
origin + (rot.(# - origin)) & /@ Drop[pts, nb]]]
```

The function below computing the tangent correlation between the 1<sup>st</sup> inter-moiety vector in the monomer and the 1<sup>st</sup> inter-moiety vector in the 1<sup>st</sup> monomer.

```
cosVals[pts_] := Table[(pts[[k]] - pts[[k - 1]]).(pts[[3]] -
pts[[2]])/(Norm[pts[[k]] - pts[[k - 1]]] Norm[pts[[3]] - pts[[2]]]), {k, 3, Length[pts],
8}]randomRotate[pts_] := Module[{}, newpts = pts;
```

```
Do[If[(k - 8 Floor[k/8]) == 2, newpts = dihedralRotate[newpts, k,
thB[RandomReal[]] Degree], If[(k - 8 Floor[k/8]) == 4, newpts =
dihedralRotate[newpts, k, thA[RandomReal[]] Degree], If[(k - 8 Floor[k/8]) == 6,
newpts = dihedralRotate[newpts, k, thA[RandomReal[]] Degree], If[(k - 8 Floor[k/8])
== 0, newpts = dihedralRotate[newpts, k, thB[RandomReal[]] Degree]]], {k, 2,
Length[pts], 2}]; newpts]
```

We rotate a P-3T 10mer over 10,000 times to compute tangent-tangent correlation function.

```
Clear[ch]
```

```
ch = chain[80];
```

```
cosList2 = ParallelTable[cosVals[randomRotate[ch]], {10000}];
```

```
corr2 = Plus @@ cosList2/10000;
```

```
ListPlot[Table[{i - 1, Log[corr2[[i]]}], {i, 1, 10}], PlotStyle -> {Blue,
```



*PointSize[0.02]}*, *Frame*  $\rightarrow$  *True*, *FrameLabel*  $\rightarrow$  {"Repeat Units", "<V0.Vn>"},  
*FrameTicks*  $\rightarrow$  {Automatic, Automatic, Automatic, Automatic}, *LabelStyle*  $\rightarrow$   
*Directive[FontFamily*  $\rightarrow$  "Helvetica", 16]]

out =

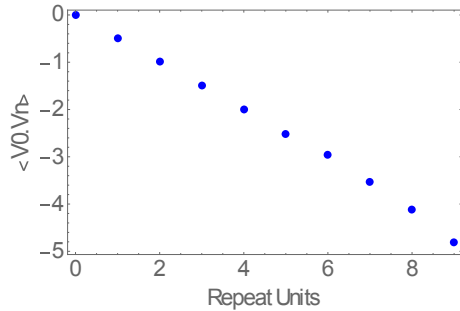

*logFitP-3T[x\_] = Fit[Log[corr2[[1 ;; 10]]], {1, x}, x]*

out =

*0.585085 - 0.522835 x*

The number of repeat units ( $N_p$ ) of P-3T is compute as the following: *-1/logFitP-3T'[x]*

out =

*1.91265*

#### (4) Estimating the persistence length ( $l_p$ ) for P-4T

Type A dihedral is the dihedral angle between fluoro-thiophene and fluoro-thiophene. Type B dihedral is the dihedral angle between thiophene and the BNBP unit. Type C dihedral is the dihedral angle between fluoro-thiophene and thiophene.

*dihedralA = {{180, 0.0}, {170, 0.63905}, {160, 2.69508}, {150, 5.75903}, {140, 9.30871}, {130, 12.49029}, {120, 15.51592}, {110, 18.34516}, {100, 20.8974}, {90, 21.98252}, {80, 21.506}, {70, 19.69046}, {60, 17.23142}, {50, 14.50904}, {40, 12.71818}, {30, 12.5617}, {20, 13.94692}, {10, 15.89478}, {0, 17.11248}};*

*dihedralB = {{180, 0.92916}, {170, 0.44423}, {160, 0.0}, {150, 0.37203}, {140, 1.93998}, {130, 4.78366}, {120, 9.05903}, {110, 13.1296}, {100, 16.2059}, {90, 17.44724}, {80, 16.32457}, {70, 13.20154}, {60, 9.35229}, {50, 5.81601}, {40, 3.16714}, {30, 1.7709}, {20, 1.53172}, {10, 2.19807}, {0, 2.75861}};*

*dihedralC = {{180, 0.33528}, {170, 0.01339}, {160, 0.0}, {150, 0.53193}, {140,*

1.76617}, {130, 3.53629}, {120, 5.47207}, {110, 7.49607}, {100, 9.04669}, {90, 9.63191}, {80, 8.95558}, {70, 7.26108}, {60, 4.94539}, {50, 2.73918}, {40, 1.27416}, {30, 0.74223}, {20, 1.44192}, {10, 2.29705}, {0, 2.81112}};

The dihedral potentials were fitted by the following equations.

$$\text{fitfA}[x\_ ] = \text{Fit}[\text{dihedralA}, \{1, \text{Cos}[\text{Pi}(x)/180], \text{Cos}[\text{Pi}(x)/180]^2, \text{Cos}[\text{Pi}(x)/180]^3, \text{Cos}[\text{Pi}(x)/180]^4, \text{Cos}[\text{Pi}(x)/180]^5, \text{Cos}[\text{Pi}(x)/180]^6, \text{Cos}[\text{Pi}(x)/180]^7, \text{Cos}[\text{Pi}(x)/180]^8, \text{Cos}[\text{Pi}(x)/180]^9, \text{Cos}[\text{Pi}(x)/180]^10, \text{Cos}[\text{Pi}(x)/180]^11, \text{Cos}[\text{Pi}(x)/180]^12, \text{Cos}[\text{Pi}(x)/180]^13, \text{Cos}[\text{Pi}(x)/180]^14\}, (x)]$$

out =

$$22.0073 + 1.71111 \text{Cos}[(\text{Pi} x)/180] - 28.3251 \text{Cos}[(\text{Pi} x)/180]^2 + 3.34896 \text{Cos}[(\text{Pi} x)/180]^3 + 25.3447 \text{Cos}[(\text{Pi} x)/180]^4 - 9.36824 \text{Cos}[(\text{Pi} x)/180]^5 + 22.1851 \text{Cos}[(\text{Pi} x)/180]^6 - 53.9623 \text{Cos}[(\text{Pi} x)/180]^7 - 223.63 \text{Cos}[(\text{Pi} x)/180]^8 + 213.483 \text{Cos}[(\text{Pi} x)/180]^9 + 467.426 \text{Cos}[(\text{Pi} x)/180]^10 - 230.91 \text{Cos}[(\text{Pi} x)/180]^11 - 414.619 \text{Cos}[(\text{Pi} x)/180]^12 + 84.2418 \text{Cos}[(\text{Pi} x)/180]^13 + 138.15 \text{Cos}[(\text{Pi} x)/180]^14$$

$$\text{fitfB}[x\_ ] = \text{Fit}[\text{dihedralB}, \{1, \text{Cos}[\text{Pi}(x)/180], \text{Cos}[\text{Pi}(x)/180]^2, \text{Cos}[\text{Pi}(x)/180]^3, \text{Cos}[\text{Pi}(x)/180]^4, \text{Cos}[\text{Pi}(x)/180]^5, \text{Cos}[\text{Pi}(x)/180]^6, \text{Cos}[\text{Pi}(x)/180]^7, \text{Cos}[\text{Pi}(x)/180]^8, \text{Cos}[\text{Pi}(x)/180]^9, \text{Cos}[\text{Pi}(x)/180]^10, \text{Cos}[\text{Pi}(x)/180]^11, \text{Cos}[\text{Pi}(x)/180]^12, \text{Cos}[\text{Pi}(x)/180]^13, \text{Cos}[\text{Pi}(x)/180]^14\}, (x)]$$

out =

$$17.4574 + 0.769079 \text{Cos}[(\text{Pi} x)/180] - 41.3535 \text{Cos}[(\text{Pi} x)/180]^2 - 14.6934 \text{Cos}[(\text{Pi} x)/180]^3 + 52.261 \text{Cos}[(\text{Pi} x)/180]^4 + 97.9877 \text{Cos}[(\text{Pi} x)/180]^5 - 123.982 \text{Cos}[(\text{Pi} x)/180]^6 - 250.559 \text{Cos}[(\text{Pi} x)/180]^7 + 237.526 \text{Cos}[(\text{Pi} x)/180]^8 + 310.513 \text{Cos}[(\text{Pi} x)/180]^9 - 197.836 \text{Cos}[(\text{Pi} x)/180]^10 - 187.988 \text{Cos}[(\text{Pi} x)/180]^11 + 36.7978 \text{Cos}[(\text{Pi} x)/180]^12 + 44.886 \text{Cos}[(\text{Pi} x)/180]^13 + 20.9635 \text{Cos}[(\text{Pi} x)/180]^14$$

$$\text{fitfC}[x\_ ] = \text{Fit}[\text{dihedralB}, \{1, \text{Cos}[\text{Pi}(x)/180], \text{Cos}[\text{Pi}(x)/180]^2, \text{Cos}[\text{Pi}(x)/180]^3, \text{Cos}[\text{Pi}(x)/180]^4, \text{Cos}[\text{Pi}(x)/180]^5, \text{Cos}[\text{Pi}(x)/180]^6, \text{Cos}[\text{Pi}(x)/180]^7, \text{Cos}[\text{Pi}(x)/180]^8, \text{Cos}[\text{Pi}(x)/180]^9, \text{Cos}[\text{Pi}(x)/180]^10, \text{Cos}[\text{Pi}(x)/180]^11, \text{Cos}[\text{Pi}(x)/180]^12, \text{Cos}[\text{Pi}(x)/180]^13, \text{Cos}[\text{Pi}(x)/180]^14\}, (x)]$$

out =

$$9.60992 - 0.425669 \cos\left(\frac{\pi x}{180}\right) - 19.3169 \cos^2\left(\frac{\pi x}{180}\right) + 5.70692 \cos^3\left(\frac{\pi x}{180}\right) - 11.2036 \cos^4\left(\frac{\pi x}{180}\right) - 61.1007 \cos^5\left(\frac{\pi x}{180}\right) + 147.514 \cos^6\left(\frac{\pi x}{180}\right) + 218.86 \cos^7\left(\frac{\pi x}{180}\right) - 431.386 \cos^8\left(\frac{\pi x}{180}\right) - 366.086 \cos^9\left(\frac{\pi x}{180}\right) + 630.147 \cos^{10}\left(\frac{\pi x}{180}\right) + 299.857 \cos^{11}\left(\frac{\pi x}{180}\right) - 454.061 \cos^{12}\left(\frac{\pi x}{180}\right) - 95.5734 \cos^{13}\left(\frac{\pi x}{180}\right) + 130.244 \cos^{14}\left(\frac{\pi x}{180}\right)$$

```
Show[ListPlot[{dihedralA, dihedralB, dihedralC}, PlotMarkers -> Automatic, PlotStyle -> {{Blue}, {Purple}, {Black}}, PlotRange -> All, Frame -> True, FrameTicks -> {Automatic, Automatic, Automatic, Automatic}, FrameLabel -> {"Dihedral Angle [Deg.]", "Dihedral Potential (kJ/mol)"}, LabelStyle -> Directive[FontFamily -> "Helvetica", 16], PlotLegends -> (Style[#, FontFamily -> "Helvetica", FontSize -> 16] & / {"Dihedral fT-fT", "Dihedral BNP-T", "Dihedral T-fT"})], Plot[{fitfA[x], fitfB[x], fitfC[x]}, {x, 0, 180}, PlotStyle -> {{Blue, Thickness[0.004], Dashed}, {Purple, Thickness[0.004], Dashed}, {Black, Thickness[0.004], Dashed}}, PlotRange -> All, Frame -> True, Axes -> False, FrameLabel -> {"Dihedral Angle [deg.]", "Dihedral Potential (kJ/mol)"}, FrameTicks -> {True, True, True, True}, LabelStyle -> Directive[FontFamily -> "Helvetica", 16]]]
```

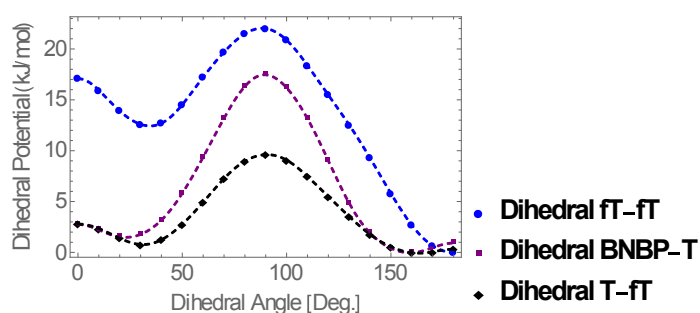

$kTval = 2.43652$

$normValA = 2 NIntegrate[Exp[-fitfA[x]/kTval], \{x, 0, 180\}];$

$normValB = 2 NIntegrate[Exp[-fitfB[x]/kTval], \{x, 0, 180\}];$

$normValC = 2 NIntegrate[Exp[-fitfC[x]/kTval], \{x, 0, 180\}];$

$probA[x_] := Exp[-fitfA[x]/kTval]/normValA /; 0 \leq x \leq 180;$

```

probA[x_] := probA[360 - x] /; 180 < x ≤ 360; probB[x_] := Exp[-
fitfB[x]/kTval]/normValB /; 0 ≤ x ≤ 180; probB[x_] := probB[360 - x] /; 180 < x ≤
360; probC[x_] := Exp[-fitfC[x]/kTval]/normValC /; 0 ≤ x ≤ 180; probC[x_] :=
probC[360 - x] /; 180 < x ≤ 360;

```

```

Plot[{probA[x], probB[x], probC[x]}, {x, 0, 360}, PlotStyle -> Automatic,
PlotRange -> Automatic, Frame -> True, FrameTicks -> {Automatic, Automatic,
Automatic, Automatic}, FrameLabel -> {"Dihedral Angle [deg.]", "Probability"},
LabelStyle -> Directive[FontFamily -> "Helvetica", 16], PlotLegends -> (Style[#,
FontFamily -> "Helvetica", FontSize -> 16] & /@ {"Dihedral fT-fT", "Dihedral
BNBP-T", "Dihedral T-fT"})]

```

out =

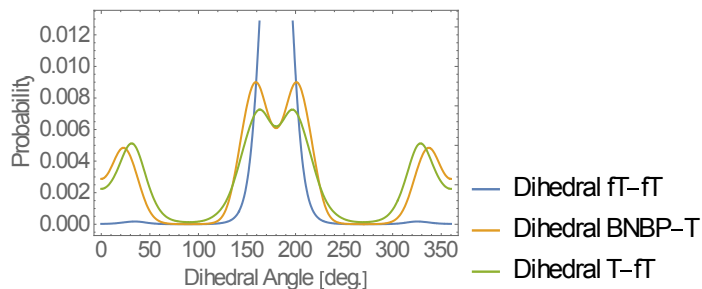

Here we compute the cumulative probability for A, B and C types of dihedral angles.

```

pIntTableA = Quiet[Table[{NIntegrate[probA[xp], {xp, 0, x}], x}, {x, 0, 360}]];
pIntTableB = Quiet[Table[{NIntegrate[probB[xp], {xp, 0, x}], x}, {x, 0, 360}]];
pIntTableC = Quiet[Table[{NIntegrate[probC[xp], {xp, 0, x}], x}, {x, 0, 360}]];
ListLinePlot[{pIntTableA, pIntTableB, pIntTableC}, PlotStyle -> Automatic,
Frame -> True, Axes -> False, FrameLabel -> {"Cumulative Probability", "Dihedral
Angle [deg.]"}, FrameTicks -> {Automatic, Automatic, Automatic, Automatic},
LabelStyle -> Directive[FontFamily -> "Helvetica", 16], PlotLegends -> (Style[#,
FontFamily -> "Helvetica", FontSize -> 16] & /@ {"Dihedral fT-fT", "Dihedral
BNBP-T", "Dihedral T-fT"})]

```

out =

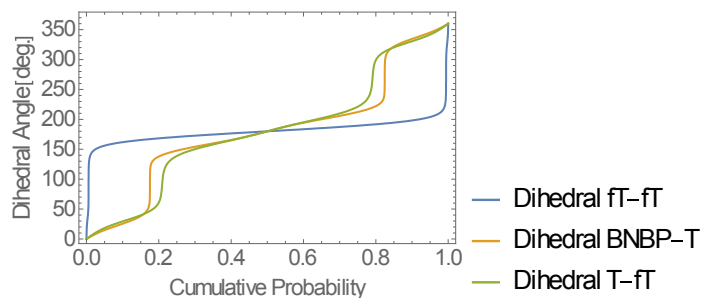

$thA[prob\_] = Interpolation[pIntTableA][prob];$

$thB[prob\_] = Interpolation[pIntTableB][prob];$

$thC[prob\_] = Interpolation[pIntTableC][prob];$

We construct the P-4T chain:

Length of C-C (across the 1<sup>st</sup> thiophene) is 2.52516 Å;

Length of C-C bond (between the 1<sup>st</sup> thiophene and the 1<sup>st</sup> fluoro-thiophene) is 1.44576 Å;

Length of C-C (across the 1<sup>st</sup> fluoro-thiophenering) is 2.54194 Å;

Length of C-C bond (between the 1<sup>st</sup> fluoro-thiophene and the 2<sup>nd</sup> fluoro-thiophene) is 1.43589 Å;

Length of C-C (across the 2<sup>nd</sup> fluoro-thiophene) is 2.54363 Å;

Length of C-C bond (between the 2<sup>nd</sup> fluoro-thiophene and the 2<sup>nd</sup> thiophene) is 1.44457 Å;

Length of C-C (across the 2<sup>nd</sup> thiophene) is 2.52686 Å;

Length of C-C bond (between the 2<sup>nd</sup> thiophene and the BNPB unit) is 1.45992 Å;

Length of C-C (across the BNPB unit) is 7.04278 Å;

Length of C-C bond (between the BNPB unit and the 3<sup>rd</sup> thiophene) is 1.45939 Å;

Deflection angles (the angle corresponding to the deflection of P-4T backbone bond from Z-axis) are listed below from angle 1 to angle 10.

$lbb = 2.52516;$

$lcc1 = 1.44576;$

$lcsc1 = 2.54194;$

$lcc2 = 1.43589;$

```

lsc2 = 2.54363;
lcc3 = 1.44457;
lsc3 = 2.52686;
lcc4 = 1.45992;
lsc4 = 7.04278;
lcc5 = 1.45939;
l = {lbb, lcc1, lsc1, lcc2, lsc2, lcc3, lsc3, lcc4, lsc4, lcc5};
Angle1 = -17.96605/180 Pi;
Angle2 = 14.26171/180 Pi;
Angle3 = 13.21406/180 Pi;
Angle4 = -13.05738/180 Pi;
Angle5 = -13.83939/180 Pi;
Angle6 = 18.04276/180 Pi;
Angle7 = 14.3615/180 Pi;
Angle8 = -3.62208/180 Pi;
Angle9 = 3.76038/180 Pi;
Angle10 = -14.26547/180 Pi;
Angle = {Angle1, Angle2, Angle3, Angle4, Angle5, Angle6, Angle7, Angle8,
Angle9, Angle10};

```

```

v[i_] := If[i > 1, RotationMatrix[Angle[[Mod[i - 1, 10, 1]]]].v[i - 1]*(l[[Mod[i,
10, 1]]])/(l[[Mod[i - 1, 10, 1]]]), l[[1]] {1, 0}]

```

Now we can construct an initial conformation for P-4T.

```

chain[n_] := Append[#, 0] & /@ Prepend[Accumulate[Table[v[k], {k, 1, n}]],
{0, 0}]; drawChain[pts_] := Graphics3D[{PointSize[.03], Point /@ pts, Thick,
Table[{Hue[(1/10) Mod[i, 10]], Line[{pts[[i]], pts[[i + 1]]}], {i, 1, Length[pts] -
1}}];

```

A drawing of P-4T dimer is obtained.

```
drawChain[chain[20]]
```

out =

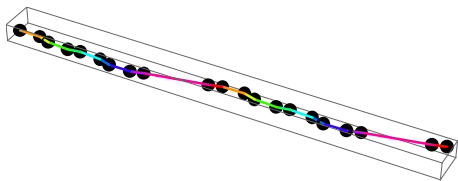

Then, we rotate a backbone dihedral angle by certain degree. Only the tangent vectors with even index (corresponding to the inter-moiety bond) will be rotated.

```
dihedralRotate[pts_, nb_?EvenQ, theta_] := Module[{}, vec = pts[[nb + 1]] -
pts[[nb]]; origin = pts[[nb]]; rot = RotationMatrix[theta, vec]; Join[Take[pts, nb],
origin + (rot.(# - origin)) & /@ Drop[pts, nb]]]
```

The function below computing the tangent correlation between the 1<sup>st</sup> inter-moiety vector in the monomer and the 1<sup>st</sup> inter-moiety vector in the 1<sup>st</sup> monomer.

```
cosVals[pts_] := Table[(pts[[k]] - pts[[k - 1]]) . (pts[[3]] -
pts[[2]]) / (Norm[pts[[k]] - pts[[k - 1]]] Norm[pts[[3]] - pts[[2]]]), {k, 3, Length[pts],
10}] randomRotate[pts_] := Module[{}, newpts = pts;
```

```
Do[If[(k - 10 Floor[k/10]) == 2, newpts = dihedralRotate[newpts, k,
thC[RandomReal[]] Degree], If[(k - 10 Floor[k/10]) == 4, newpts =
dihedralRotate[newpts, k, thA[RandomReal[]] Degree], If[(k - 10 Floor[k/10]) == 6,
newpts = dihedralRotate[newpts, k, thC[RandomReal[]] Degree], If[(k - 10
Floor[k/10]) == 8, newpts = dihedralRotate[newpts, k, thB[RandomReal[]] Degree],
If[(k - 10 Floor[k/10]) == 0, newpts = dihedralRotate[newpts, k, thB[RandomReal[]]
Degree]]]], {k, 2, Length[pts], 2}]; newpts]
```

We rotate a P-4T 10mer over 10,000 times to compute tangent-tangent correlation function.

```
Clear[ch]
ch = chain[100];
cosList2 = ParallelTable[cosVals[randomRotate[ch]], {10000}];
corr2 = Plus @@ cosList2/10000;
ListPlot[Table[{i - 1, Log[corr2[[i]]]}, {i, 1, 8}], PlotStyle -> {Blue,
PointSize[0.02]}, Frame -> True, FrameLabel -> {"Repeat Units", "<V0.Vn>"},
FrameTicks -> {Automatic, Automatic, Automatic, Automatic}, LabelStyle ->
```

Directive[FontFamily -> "Helvetica", 16]]

out =

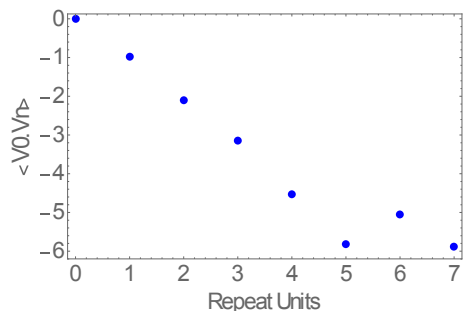

$$\log\text{FitP-4T}[x] = \text{Fit}[\text{Log}[\text{corr2}[[1 ;; 8]]], \{1, x\}, x]$$

out =

$$0.530046 - 0.88161 x$$

The number of repeat units ( $N_p$ ) of P-4T is compute as the following:  $-1/\log\text{FitP-4T}[x]$

out =

$$1.13429$$

(5) Estimating the persistence length ( $l_p$ ) for P-5T

Type A dihedral is the dihedral angle between thiophene and the BNPB unit. Type B dihedral is the dihedral angle between thiophene and thiophene. Type C dihedral is the dihedral angle between thiophene and fluoro-thiophene.

$$\text{dihedralA} = \{\{180, 0.94387\}, \{170, 0.50751\}, \{160, 0.0\}, \{150, 1.21114\}, \{140, 2.68904\}, \{130, 5.35156\}, \{120, 8.91226\}, \{110, 12.66121\}, \{100, 15.53403\}, \{90, 16.77721\}, \{80, 15.80262\}, \{70, 13.16531\}, \{60, 9.54921\}, \{50, 6.04548\}, \{40, 3.29316\}, \{30, 1.862\}, \{20, 1.68977\}, \{10, 2.74181\}, \{0, 2.94135\}\};$$

$$\text{dihedralB} = \{\{180, 0.08349\}, \{170, 0.06774\}, \{160, 0.0\}, \{150, 0.64193\}, \{140, 1.84704\}, \{130, 3.32887\}, \{120, 5.34237\}, \{110, 7.47375\}, \{100, 9.3263\}, \{90, 9.83013\}, \{80, 9.06874\}, \{70, 7.48399\}, \{60, 5.1003\}, \{50, 3.02746\}, \{40, 1.78271\}, \{30, 1.51203\}, \{20, 2.06417\}, \{10, 3.06028\}, \{0, 3.37981\}\};$$

$$\text{dihedralC} = \{\{180, 0.0\}, \{170, 0.30692\}, \{160, 1.35817\}, \{150, 3.16924\}, \{140, 5.67318\}, \{130, 8.67308\}, \{120, 11.93053\}, \{110, 15.06354\}, \{100, 17.4853\}, \{90, 18.39031\}, \{80, 17.66725\}, \{70, 15.57998\}, \{60, 12.66016\}, \{50, 9.44812\}, \{40,$$



6.50861}, {30, 4.20133}, {20, 2.86836}, {10, 2.39839}, {0, 2.32488}};

The dihedral potentials were fitted by the following equations.

$$\text{fitfA}[x\_ ] = \text{Fit}[\text{dihedralA}, \{1, \text{Cos}[\text{Pi}(x)/180], \text{Cos}[\text{Pi}(x)/180]^2, \text{Cos}[\text{Pi}(x)/180]^3, \text{Cos}[\text{Pi}(x)/180]^4, \text{Cos}[\text{Pi}(x)/180]^5, \text{Cos}[\text{Pi}(x)/180]^6, \text{Cos}[\text{Pi}(x)/180]^7, \text{Cos}[\text{Pi}(x)/180]^8, \text{Cos}[\text{Pi}(x)/180]^9, \text{Cos}[\text{Pi}(x)/180]^10, \text{Cos}[\text{Pi}(x)/180]^11, \text{Cos}[\text{Pi}(x)/180]^12, \text{Cos}[\text{Pi}(x)/180]^13, \text{Cos}[\text{Pi}(x)/180]^14\}, (x)]$$

out =

$$16.7798 + 0.555475 \text{Cos}[(\text{Pi} x)/180] - 38.8102 \text{Cos}[(\text{Pi} x)/180]^2 + 7.94713 \text{Cos}[(\text{Pi} x)/180]^3 + 73.7003 \text{Cos}[(\text{Pi} x)/180]^4 - 83.6977 \text{Cos}[(\text{Pi} x)/180]^5 - 292.406 \text{Cos}[(\text{Pi} x)/180]^6 + 344.241 \text{Cos}[(\text{Pi} x)/180]^7 + 763.514 \text{Cos}[(\text{Pi} x)/180]^8 - 676.608 \text{Cos}[(\text{Pi} x)/180]^9 - 1013.31 \text{Cos}[(\text{Pi} x)/180]^10 + 625.07 \text{Cos}[(\text{Pi} x)/180]^11 + 647.789 \text{Cos}[(\text{Pi} x)/180]^12 - 216.503 \text{Cos}[(\text{Pi} x)/180]^13 - 155.257 \text{Cos}[(\text{Pi} x)/180]^14$$

$$\text{fitfB}[x\_ ] = \text{Fit}[\text{dihedralB}, \{1, \text{Cos}[\text{Pi}(x)/180], \text{Cos}[\text{Pi}(x)/180]^2, \text{Cos}[\text{Pi}(x)/180]^3, \text{Cos}[\text{Pi}(x)/180]^4, \text{Cos}[\text{Pi}(x)/180]^5, \text{Cos}[\text{Pi}(x)/180]^6, \text{Cos}[\text{Pi}(x)/180]^7, \text{Cos}[\text{Pi}(x)/180]^8, \text{Cos}[\text{Pi}(x)/180]^9, \text{Cos}[\text{Pi}(x)/180]^10, \text{Cos}[\text{Pi}(x)/180]^11, \text{Cos}[\text{Pi}(x)/180]^12, \text{Cos}[\text{Pi}(x)/180]^13, \text{Cos}[\text{Pi}(x)/180]^14\}, (x)]$$

out =

$$9.84288 - 1.14705 \text{Cos}[(\text{Pi} x)/180] - 22.6943 \text{Cos}[(\text{Pi} x)/180]^2 + 20.1382 \text{Cos}[(\text{Pi} x)/180]^3 + 34.8859 \text{Cos}[(\text{Pi} x)/180]^4 - 130.145 \text{Cos}[(\text{Pi} x)/180]^5 - 167.26 \text{Cos}[(\text{Pi} x)/180]^6 + 371.937 \text{Cos}[(\text{Pi} x)/180]^7 + 573.688 \text{Cos}[(\text{Pi} x)/180]^8 - 534.667 \text{Cos}[(\text{Pi} x)/180]^9 - 946.456 \text{Cos}[(\text{Pi} x)/180]^10 + 387.031 \text{Cos}[(\text{Pi} x)/180]^11 + 738.875 \text{Cos}[(\text{Pi} x)/180]^12 - 111.506 \text{Cos}[(\text{Pi} x)/180]^13 - 219.133 \text{Cos}[(\text{Pi} x)/180]^14$$

$$\text{fitfC}[x\_ ] = \text{Fit}[\text{dihedralB}, \{1, \text{Cos}[\text{Pi}(x)/180], \text{Cos}[\text{Pi}(x)/180]^2, \text{Cos}[\text{Pi}(x)/180]^3, \text{Cos}[\text{Pi}(x)/180]^4, \text{Cos}[\text{Pi}(x)/180]^5, \text{Cos}[\text{Pi}(x)/180]^6, \text{Cos}[\text{Pi}(x)/180]^7, \text{Cos}[\text{Pi}(x)/180]^8, \text{Cos}[\text{Pi}(x)/180]^9, \text{Cos}[\text{Pi}(x)/180]^10, \text{Cos}[\text{Pi}(x)/180]^11, \text{Cos}[\text{Pi}(x)/180]^12, \text{Cos}[\text{Pi}(x)/180]^13, \text{Cos}[\text{Pi}(x)/180]^14\}, (x)]$$

out =

$$18.3981 + 0.331787 \text{Cos}[(\text{Pi} x)/180] - 27.9415 \text{Cos}[(\text{Pi} x)/180]^2 +$$

$$7.50761 \cos\left(\frac{\pi x}{180}\right)^3 + 14.3842 \cos\left(\frac{\pi x}{180}\right)^4 - 45.0382 \cos\left(\frac{\pi x}{180}\right)^5 + 5.49387 \cos\left(\frac{\pi x}{180}\right)^6 + 120.939 \cos\left(\frac{\pi x}{180}\right)^7 - 40.5556 \cos\left(\frac{\pi x}{180}\right)^8 - 170.885 \cos\left(\frac{\pi x}{180}\right)^9 + 60.7542 \cos\left(\frac{\pi x}{180}\right)^{10} + 122.998 \cos\left(\frac{\pi x}{180}\right)^{11} - 41.0609 \cos\left(\frac{\pi x}{180}\right)^{12} - 34.6891 \cos\left(\frac{\pi x}{180}\right)^{13} + 11.6892 \cos\left(\frac{\pi x}{180}\right)^{14}$$

```
Show[ListPlot[{dihedralA, dihedralB, dihedralC}, PlotMarkers -> Automatic,
PlotStyle -> {{Blue}, {Purple}, {Black}}, PlotRange -> All, Frame -> True,
FrameTicks -> {Automatic, Automatic, Automatic, Automatic}, FrameLabel ->
{"Dihedral Angle [Deg.]", "Dihedral Potential (kJ/mol)"}, LabelStyle ->
Directive[FontFamily -> "Helvetica", 16], PlotLegends -> (Style[#, FontFamily ->
"Helvetica", FontSize -> 16] & / {"Dihedral BNP-T", "Dihedral T-T", "Dihedral T-
ft"})], Plot[{fitfA[x], fitfB[x], fitfC[x]}, {x, 0, 180}, PlotStyle -> {{Blue,
Thickness[0.004], Dashed}, {Purple, Thickness[0.004], Dashed}, {Black,
Thickness[0.004], Dashed}}, PlotRange -> All, Frame -> True, Axes -> False,
FrameLabel -> {"Dihedral Angle [deg.]", "Dihedral Potential (kJ/mol)"},
FrameTicks -> {True, True, True, True}, LabelStyle -> Directive[FontFamily ->
"Helvetica", 16]]]
```

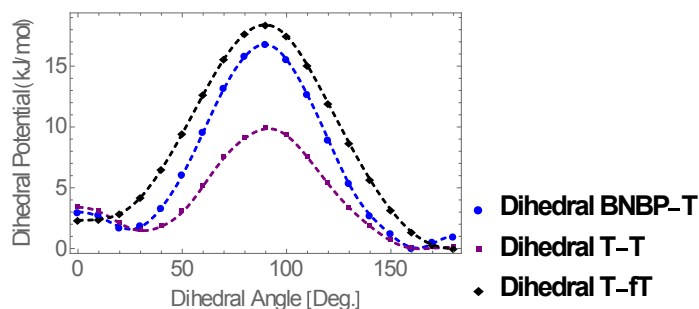

$$kTval = 2.43652$$

$$normValA = 2 NIntegrate[Exp[-fitfA[x]/kTval], {x, 0, 180}];$$

$$normValB = 2 NIntegrate[Exp[-fitfB[x]/kTval], {x, 0, 180}];$$

$$normValC = 2 NIntegrate[Exp[-fitfC[x]/kTval], {x, 0, 180}];$$

$$probA[x_] := Exp[-fitfA[x]/kTval]/normValA /; 0 \leq x \leq 180;$$

$$probA[x_] := probA[360 - x] /; 180 < x \leq 360; probB[x_] := Exp[-fitfB[x]/kTval]/normValB /; 0 \leq x \leq 180; probB[x_] := probB[360 - x] /; 180 < x \leq$$

```
360; probC[x_] := Exp[-fitfC[x]/kTval]/normValC /; 0 ≤ x ≤ 180; probC[x_] :=
probC[360 - x] /; 180 < x ≤ 360;
```

```
Plot[{probA[x], probB[x], probC[x]}, {x, 0, 360}, PlotStyle -> Automatic,
PlotRange -> Automatic, Frame -> True, FrameTicks -> {Automatic, Automatic,
Automatic, Automatic}, FrameLabel -> {"Dihedral Angle [deg.]", "Probability"},
LabelStyle -> Directive[FontFamily -> "Helvetica", 16], PlotLegends -> (Style[#,
FontFamily -> "Helvetica", FontSize -> 16] & /@ {"Dihedral BNP-T", "Dihedral
T-T", "Dihedral T-ft"})]
```

out =

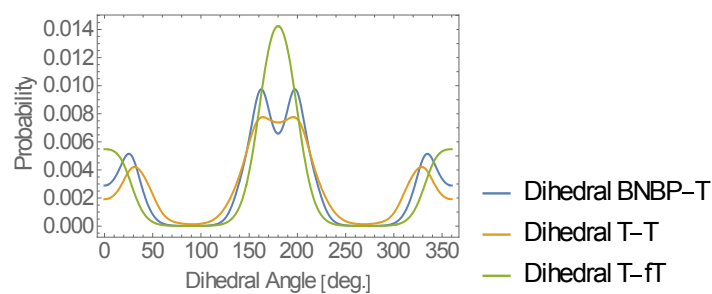

Here we compute the cumulative probability for A, B and C types of dihedral angles.

```
pIntTableA = Quiet[Table[{NIntegrate[probA[xp], {xp, 0, x}], x}, {x, 0, 360}]];
pIntTableB = Quiet[Table[{NIntegrate[probB[xp], {xp, 0, x}], x}, {x, 0, 360}]];
pIntTableC = Quiet[Table[{NIntegrate[probC[xp], {xp, 0, x}], x}, {x, 0, 360}]];
ListLinePlot[{pIntTableA, pIntTableB, pIntTableC}, PlotStyle -> Automatic,
Frame -> True, Axes -> False, FrameLabel -> {"Cumulative Probability", "Dihedral
Angle [deg.]"}, FrameTicks -> {Automatic, Automatic, Automatic, Automatic},
LabelStyle -> Directive[FontFamily -> "Helvetica", 16], PlotLegends -> (Style[#,
FontFamily -> "Helvetica", FontSize -> 16] & /@ {"Dihedral BNP-T", "Dihedral
T-T", "Dihedral T-ft"})]
```

out =

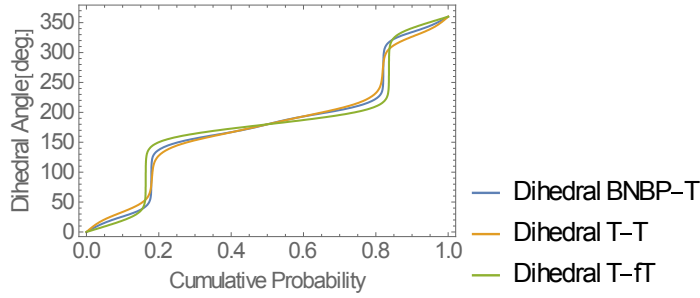

$thA[prob\_j] = Interpolation[pIntTableA][prob];$

$thB[prob\_j] = Interpolation[pIntTableB][prob];$

$thC[prob\_j] = Interpolation[pIntTableC][prob];$

We construct the P-5T chain:

*Length of C-C (across the 1<sup>st</sup> thiophene) is 2.52763 Å;*

*Length of C-C bond (between the 1<sup>st</sup> thiophene and the 2<sup>nd</sup> thiophene) is 1.44552 Å;*

*Length of C-C (across the 2<sup>nd</sup> thiophenering) is 2.53028 Å;*

*Length of C-C bond (between the 2<sup>nd</sup> thiophene and the fluoro-thiophene) is 1.43793 Å;*

*Length of C-C (across the fluoro-thiophene) is 2.55995 Å;*

*Length of C-C bond (between the fluoro-thiophene and the 3<sup>rd</sup> thiophene) is 1.43793 Å;*

*Length of C-C (across the 3<sup>rd</sup> thiophene) is 2.53039 Å;*

*Length of C-C bond (between the 3<sup>rd</sup> thiophene and the 4<sup>th</sup> thiophene) is 1.44550 Å;*

*Length of C-C (across the 4<sup>th</sup> thiophene) is 2.52769 Å;*

*Length of C-C bond (between the 4<sup>th</sup> thiophene and the BNP unit) is 1.45965 Å;*

*Length of C-C (across the BNP unit) is 7.04349 Å;*

*Length of C-C bond (between the BNP unit and the 5<sup>th</sup> thiophene) is 1.45926 Å;*

Deflection angles (the angle corresponding to the deflection of P-5T backbone bond from Z-axis) are listed below from angle 1 to angle 12.

$v[i\_j] := If[i > 1, RotationMatrix[Angle[[Mod[i - 1, 12], 1]]].v[i - 1]]*(l[[Mod[i, 12, 1]]])/(l[[Mod[i - 1, 12, 1]]]), l[[1]] \{1, 0\}$

Now we can construct an initial conformation for P-5T.

```
chain[n_] := Append[#, 0] & /@ Prepend[Accumulate[Table[v[k], {k, 1, n}],
{0, 0}]; drawChain[pts_] := Graphics3D[{PointSize[.03], Point /@ pts, Thick,
Table[{Hue[(1/12) Mod[i, 12]], Line[{pts[[i]], pts[[i + 1]]}], {i, 1, Length[pts] -
1}}];
```

A drawing of P-5T dimer is obtained.

```
drawChain[chain[24]]
```

out =

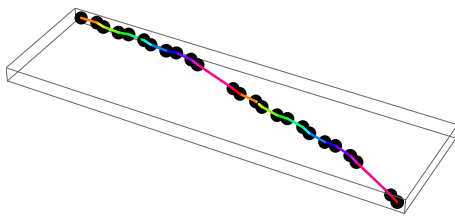

Then, we rotate a backbone dihedral angle by certain degree. Only the tangent vectors with even index (corresponding to the inter-moiety bond) will be rotated.

```
dihedralRotate[pts_, nb_?EvenQ, theta_] := Module[{}, vec = pts[[nb + 1]] -
pts[[nb]]; origin = pts[[nb]]; rot = RotationMatrix[theta, vec]; Join[Take[pts, nb],
origin + (rot.(# - origin)) & /@ Drop[pts, nb]]] cosVals[pts_] := Table[(pts[[k]] -
pts[[k - 1]].(pts[[3]] - pts[[2]))/(Norm[pts[[k]] - pts[[k - 1]]] Norm[pts[[3]] -
pts[[2]]]), {k, 3, Length[pts], 12}] randomRotate[pts_] := Module[{}, newpts = pts;
```

```
Do[If[(k - 12 Floor[k/12]) == 2, newpts = dihedralRotate[newpts, k,
thB[RandomReal[]] Degree], If[(k - 12 Floor[k/12]) == 4, newpts =
dihedralRotate[newpts, k, thC[RandomReal[]] Degree], If[(k - 12 Floor[k/12]) == 6,
newpts = dihedralRotate[newpts, k, thC[RandomReal[]] Degree], If[(k - 12
Floor[k/12]) == 8, newpts = dihedralRotate[newpts, k, thB[RandomReal[]] Degree],
If[(k - 12 Floor[k/12]) == 10, newpts = dihedralRotate[newpts, k, thA[RandomReal[]]
Degree], If[(k - 12 Floor[k/12]) == 0, newpts = dihedralRotate[newpts, k,
thA[RandomReal[]] Degree]]]]], {k, 2, Length[pts], 2}]; newpts]
```

We rotate a P-5T 10mer over 10,000 times to compute tangent-tangent correlation function.

```
Clear[ch]
```

```
ch = chain[120];
```

```
cosList2 = ParallelTable[cosVals[randomRotate[ch]], {10000}];
```

```
corr2 = Plus @@ cosList2/10000;
```

```
ListPlot[Table[{i - 1, Log[corr2[[i]]}], {i, 1, 5}], PlotStyle -> {Blue,  
PointSize[0.02]}, Frame -> True, FrameLabel -> {"Repeat Units", "<V0.Vn>"},  
FrameTicks -> {Automatic, Automatic, Automatic, Automatic}, LabelStyle ->  
Directive[FontFamily -> "Helvetica", 16]]
```

out =

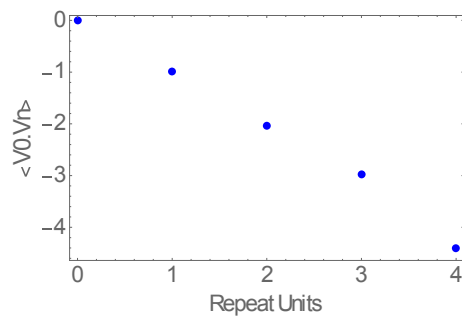

```
logFitP-5T[x_] = Fit[Log[corr2[[1 ;; 5]]], {1, x}, x]
```

out =

```
1.15648 - 1.07923 x
```

The number of repeat units ( $N_p$ ) of P-5T is compute as the following:  $-1/\logFitP-$

```
5T'[x]
```

out =

```
0.926587
```

Table S1. The persistence length  $l_p$  of the polymers P-1T, P-2T, P-3T, P-4T and P-5T.

| Polymer | The number of repeat units<br>( $N_p$ ) | The length of a repeat<br>unit <sup>a</sup> (h/Å) | The persistence length <sup>b</sup><br>( $l_p$ /nm) |
|---------|-----------------------------------------|---------------------------------------------------|-----------------------------------------------------|
| P-1T    | 6.9                                     | 12.51                                             | 8.6                                                 |
| P-2T    | 2.5                                     | 16.43                                             | 4.1                                                 |
| P-3T    | 1.9                                     | 20.34                                             | 3.9                                                 |
| P-4T    | 1.1                                     | 24.27                                             | 2.7                                                 |
| P-5T    | 0.9                                     | 28.21                                             | 2.5                                                 |

<sup>a</sup>The length of a repeat unit (h) was measured from the geometry structure in DFT.

<sup>b</sup>The persistence length ( $l_p$ ) was calculated by  $l_p = N_p \times h$ .
